# Supplementary material for: Fe/N codoped porous graphitic carbon derived from macadamia shells as an efficient cathode oxygen reduction catalyst in microbial fuel cells
Source: Royal Society of Chemistry journal article supplement (doi:10.1039/d2ra04214b), 2022-01-01
Supplement: d2ra04214b1.pdf [file d2ra04214b1.pdf]

## Supplementary materials

### Fe/N codoped porous graphitic carbon derived from macadamia shell as an efficient cathode oxygen reduction catalyst in microbial fuel cells

Haoming Ning<sup>a,b</sup>, Zhi Zhang<sup>a,b,\*</sup>, Chunhai Shi<sup>c,\*</sup>, Xiaolei Ma<sup>c</sup>, Jian Li<sup>c</sup>, Hongyi Zhu<sup>a,b</sup>,  
Jiawei Hu<sup>a,b</sup>

<sup>a</sup>Key Laboratory of Three Gorges Reservoir Region's Eco-Environment, Ministry of Education, Chongqing University, Chongqing 400045, China

<sup>b</sup>College of Environment and Ecology, Chongqing University, Chongqing 400045, China

<sup>c</sup>Municipal Engineering Northwest Design and Research Institute Co., Ltd., Lanzhou 730000, China

\*Corresponding author at: Key Laboratory of Three Gorges Reservoir Region's Eco-Environment, Ministry of Education, Chongqing University, Chongqing 400045, China. And Northwest China Municipal Engineering Northwest Design and Research Institute, Lanzhou 730000, China.

E-mail address: zhangzhicqu@cqu.edu.cn (Z. Zhang)<sup>1</sup>

E-mail address: 252440589@qq.com (S. Shi)<sup>2</sup>

---

\* Corresponding author at: Key Laboratory of Three Gorges Reservoir Region's Eco-Environment, Ministry of Education, Chongqing University, Chongqing 400045, China. And Northwest China Municipal Engineering Northwest Design and Research Institute, Lanzhou 730000, China.  
E-mail address: zhangzhicqu@cqu.edu.cn (Z. Zhang).  
E-mail address: 252440589@qq.com (S. Shi).

## Captions

**Text S1** Fabrication of the air cathodes

**Table S1** Nutrient solution formula used in MFCs

**Table S2** Chemical composition of the samples and N1s components based on XPS measurements

**Fig. S1** SEM image of (a) MSAC-N and (b) MSAC-Fe

**Fig. S2** High resolution N1s peaks of (a) MSAC-600 ,(b) MSAC-700,(c) MSAC-800, (d)MSAC-900, and (e) MSAC-N

**Fig. S3** High resolution Fe2p peaks of (a) MSAC-600 ,(b) MSAC-700,(c) MSAC-800, (d)MSAC-900, and (e) MSAC-Fe

**Fig. S4** (a) and (b) CV curves in N<sub>2</sub>- and O<sub>2</sub>-saturated 50mM PBS solutions at 5mV/s of MSAC-N and MSAC-Fe, (c)Tafel plots, (d)LSV curves in O<sub>2</sub>-saturated 50mM PBS with 1600rpm,(e)electron transfer number (*n*) and H<sub>2</sub>O<sub>2</sub> yield of MSAC-N and MSAC-Fe.

**Fig. S5** (a) Stability test of MSAC-750 in 0.1M KOH solution, (b) voltage output stability test of MFCs with MSAC-750 and Pt/C catalyst.

## **Text S1** Fabrication of the air cathodes

In this work, carbon cloth is used as the carbon-based layer of the air cathode, which also included a gas diffusion layer and catalyst layer ( $0.5 \text{ mg cm}^{-2}$ ). The gas diffusion layer was fabricated via coating PTFE solution (60 wt%) on the carbon-based layer and annealing at  $370 \text{ }^{\circ}\text{C}$  for 15 min in a muffle furnace; this process was repeated threefold. The catalyst ink was prepared by sonicating a mixture comprising the catalyst (30 mg), nafion solution (150  $\mu\text{L}$ ), isopropanol (70  $\mu\text{L}$ ), and deionized water (20  $\mu\text{L}$ ) for 15 min. The uniform catalyst ink was brushed on the carbon cloth and dried for 24 h. This preparation process was adopted for the cathode of Pt/C and MSAC catalysts.

**Table S1** Nutrient solution formula used in MFCs

| PBS solution(g/L)                                    |               | Trace elements(g/L)                                    |               | Vitamin solution(mg/L) |               |
|------------------------------------------------------|---------------|--------------------------------------------------------|---------------|------------------------|---------------|
| Component                                            | concentration | Component                                              | concentration | Component              | concentration |
| NaH <sub>2</sub> PO <sub>4</sub> ·2H <sub>2</sub> O  | 2.45          | Nitrilotriacetic acid                                  | 1.5           | Biotin                 | 2.0           |
| Na <sub>2</sub> HPO <sub>4</sub> ·12H <sub>2</sub> O | 4.57          | MgSO <sub>4</sub> ·7H <sub>2</sub> O                   | 3.0           | folic acid             | 2.0           |
| KCl                                                  | 0.13          | MnSO <sub>4</sub> ·2H <sub>2</sub> O                   | 0.5           | pyridoxine HCl         | 10.0          |
| NH <sub>4</sub> Cl                                   | 0.31          | NaCl                                                   | 1.0           | riboflavin             | 5.0           |
|                                                      |               | FeSO <sub>4</sub> ·7H <sub>2</sub> O                   | 0.1           | thiamin                | 5.0           |
|                                                      |               | CaCl·2H <sub>2</sub> O                                 | 0.1           | nicotinic acid         | 5.0           |
|                                                      |               | CoCl <sub>2</sub> ·6H <sub>2</sub> O                   | 0.1           | Pantothenic acid       | 5.0           |
|                                                      |               | ZnSO <sub>4</sub>                                      | 0.1           | Vitamin B12            | 0.1           |
|                                                      |               | CuSO <sub>4</sub> ·5H <sub>2</sub> O                   | 0.01          | paminobenzoic acid     | 5.0           |
|                                                      |               | AlK(SO <sub>4</sub> ) <sub>2</sub> ·12H <sub>2</sub> O | 0.01          | thioctic acid          | 5.0           |
|                                                      |               | H <sub>3</sub> BO <sub>3</sub>                         | 0.01          |                        |               |
|                                                      |               | Na <sub>2</sub> MoO <sub>4</sub> ·2H <sub>2</sub> O    | 0.01          |                        |               |
|                                                      |               | NiCl <sub>2</sub> ·6H <sub>2</sub> O                   | 0.024         |                        |               |
|                                                      |               | NaWO <sub>4</sub> ·2H <sub>2</sub> O                   | 0.025         |                        |               |

**Table S2** Chemical composition of the samples and N1s components based on XPS measurements

| materials | at.%(C) | at.%(N) | at.%(Fe) | Pyridinic-N(%) | Fe-Nx(%) | Pyrrolic-N(%) | Graphitic-N(%) |
|-----------|---------|---------|----------|----------------|----------|---------------|----------------|
| MSAC-600  | 80.49   | 7.49    | 0.27     | 4.45           | -        | 2.39          | 0.62           |
| MSAC-700  | 81.09   | 6.67    | 0.29     | 3.74           | -        | 2.18          | 0.74           |
| MSAC-750  | 82.96   | 6.36    | 0.54     | 2.29           | 1.69     | 1.67          | 0.71           |
| MSAC-800  | 84.65   | 5.47    | 0.61     | 1.53           | 1.38     | 1.63          | 0.91           |
| MSAC-900  | 86.12   | 4.97    | 0.73     | 0.95           | 1.36     | 1.81          | 0.82           |

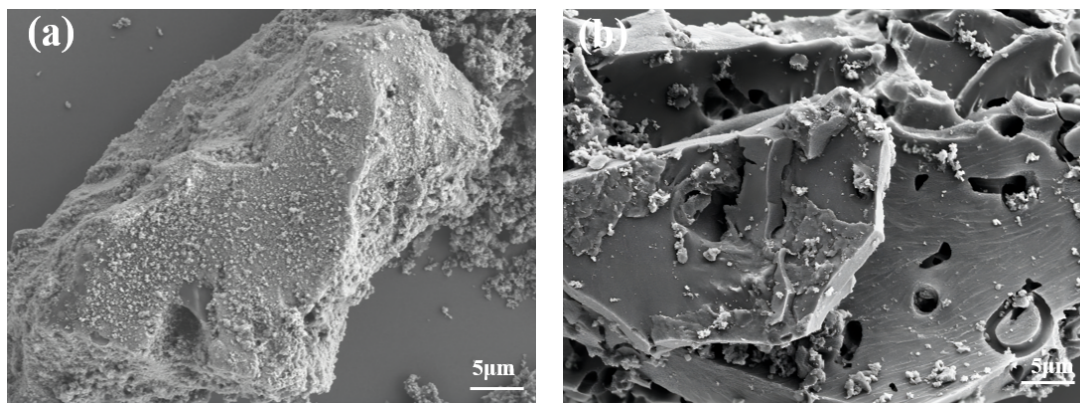

**Fig. S1** SEM image of (a) MSAC-N and (b) MSAC-Fe

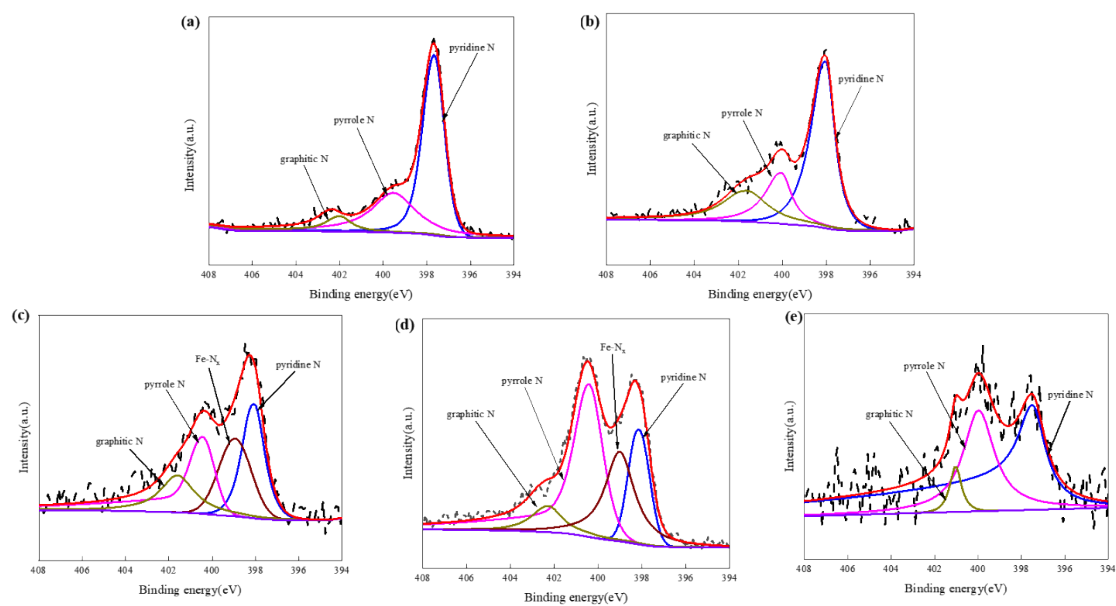

**Fig. S2** High resolution N1s peaks of (a) MSAC-600 ,(b) MSAC-700,(c) MSAC-800, (d)MSAC-900, and (e) MSAC-N

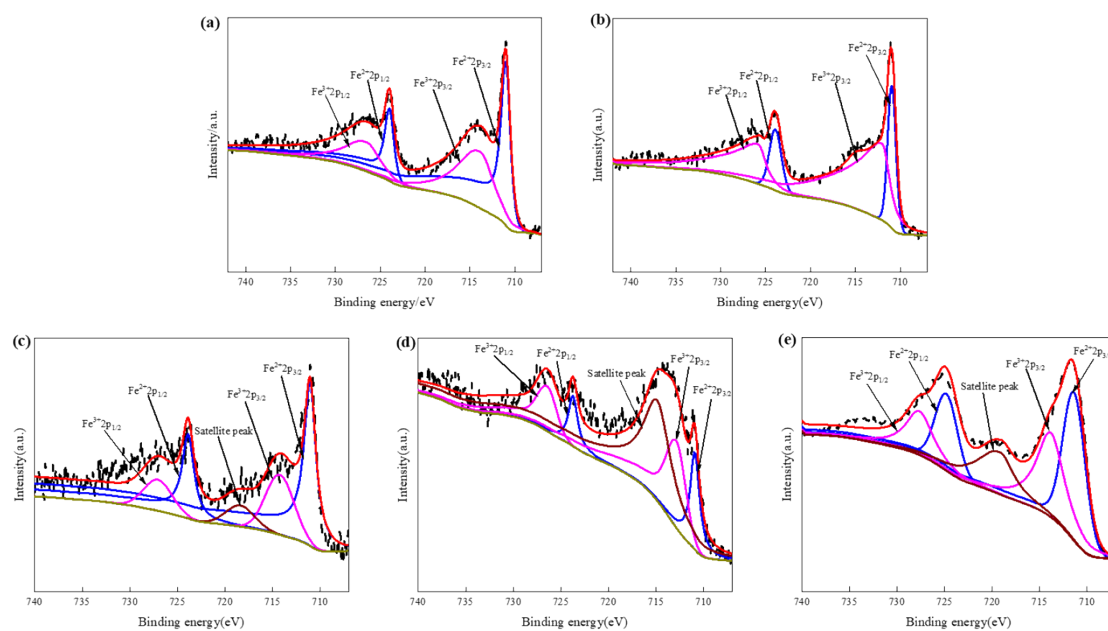

**Fig. S3** High resolution Fe2p peaks of (a) MSAC-600 ,(b) MSAC-700,(c) MSAC-800, (d)MSAC-900, and (e) MSAC-Fe

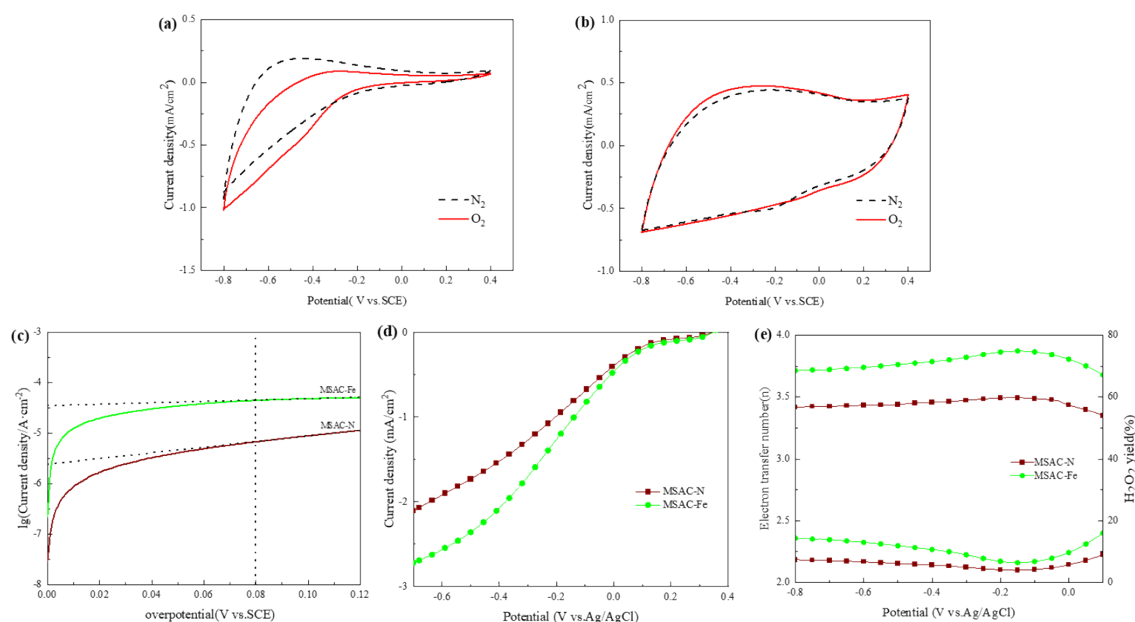

**Fig. S4** (a) and (b) CV curves in  $N_2$ - and  $O_2$ -saturated 50mM PBS solutions at 5mV/s of MSAC-N and MSAC-Fe, (c)Tafel plots, (d)LSV curves in  $O_2$ -saturated 50mM PBS with 1600rpm,(e)electron transfer number ( $n$ ) and  $H_2O_2$  yield of MSAC-N and MSAC-

Fe.

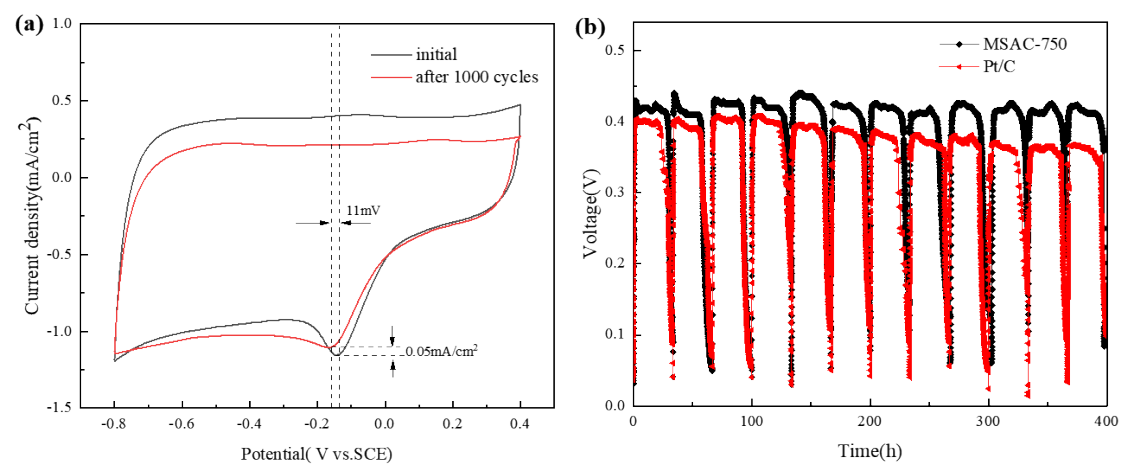

**Fig. S5** (a) Stability test of MSAC-750 in 50 mM PBS solution, (b) voltage output stability test of MFCs with MSAC-750 and Pt/C catalyst.
